# Supplementary material for: An unprecedented (4,24)-connected metal–organic framework sustained by nanosized Ag12 cuboctahedral node
Source: Royal Society of Chemistry journal article supplement (doi:10.1039/c1ce05672g), 2011-01-01

## Electronic Supplementary Information (ESI) for *CrystEngComm*

### **An unprecedented (4,24)-connected metal-organic framework sustained by nanosized Ag<sub>12</sub> cuboctahedral nodes**

**Di Sun,<sup>a,‡</sup> Yun-Hua Li,<sup>a,‡</sup> Shu-Ting Wu,<sup>b</sup> Hong-Jun Hao,<sup>a</sup> Fu-Jing Liu,<sup>a</sup> Rong-Bin Huang,<sup>\*a</sup> Lan-Sun Zheng<sup>a</sup>**

*<sup>a</sup>State Key Laboratory of Physical Chemistry of Solid Surface and Department of Chemistry, College of Chemistry and Chemical Engineering, Xiamen University, Xiamen, 361005, China.*

*E-mail: rbhuang@xmu.edu.cn; Fax: 86-592-2183047.*

*<sup>b</sup>College of Chemistry and Chemical Engineering, Fuzhou University, Fuzhou, China.*

*<sup>‡</sup> These authors contributed equally to this work.*

|                                                                                             |   |
|---------------------------------------------------------------------------------------------|---|
| (1) Fig. S1: IR of complex 1 .....                                                          | 2 |
| (2) Fig. S2: The strong $\pi \cdots \pi$ stacking between MA ligands of adjacent cages..... | 3 |

**(1) Fig. S1: IR of complex 1**

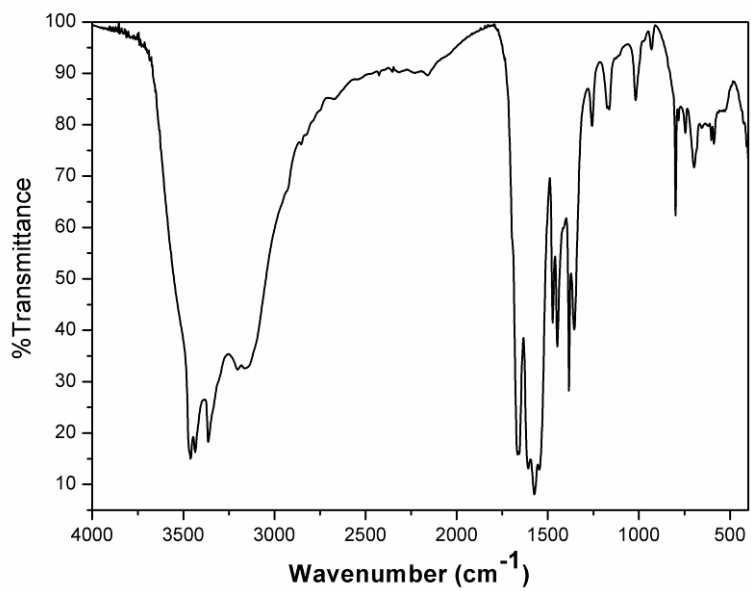

**(2) Fig. S2: The strong  $\pi \cdots \pi$  stacking between MA ligands of adjacent cages.**

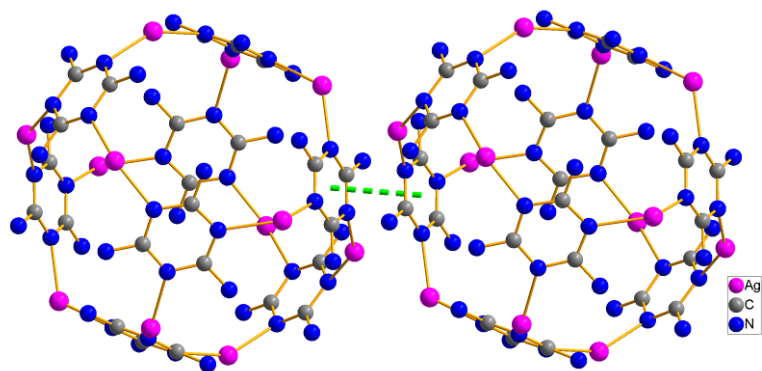

Supplement: c1ce05672g.pdf [file c1ce05672g.pdf]
